# Supplementary material for: ArI(NTf2)2: the boundary of oxidative capacity for ArIL2?
Source: Royal Society of Chemistry journal article supplement (doi:10.1039/d3cc04563c), 2023-01-01
Supplement: d3cc04563c1.pdf [file d3cc04563c1.pdf]

# Electronic Supplementary Information for ArI(NTf<sub>2</sub>)<sub>2</sub>: The boundary of oxidative capacity for ArIL<sub>2</sub>?

Lachlan Barwise, Jason D. Bennetts, Keith F. White and Jason L. Dutton\*

Department of Chemistry, La Trobe Institute for Molecular Science, La Trobe University,  
Melbourne, Victoria, Australia  
j.dutton@latrobe.edu.au

## Contents

|                                                                                                                                                                                              |    |
|----------------------------------------------------------------------------------------------------------------------------------------------------------------------------------------------|----|
| <b>General Procedures</b> .....                                                                                                                                                              | 1  |
| <b>Experimental</b> .....                                                                                                                                                                    | 2  |
| Synthesis of NO <sub>2</sub> -C <sub>6</sub> H <sub>4</sub> -I(NTf <sub>2</sub> ) <sub>2</sub> from NO <sub>2</sub> -C <sub>6</sub> H <sub>4</sub> -IF <sub>2</sub> (Procedure 1) .....      | 2  |
| Synthesis of NO <sub>2</sub> -C <sub>6</sub> H <sub>4</sub> -I(NTf <sub>2</sub> ) <sub>2</sub> from NO <sub>2</sub> -C <sub>6</sub> H <sub>4</sub> -I(OTFA) <sub>2</sub> (Procedure 2) ..... | 2  |
| Reaction of NO <sub>2</sub> -C <sub>6</sub> H <sub>4</sub> -I(NTf <sub>2</sub> ) <sub>2</sub> with 3-methylcyclohexene .....                                                                 | 2  |
| <b>X-Ray crystallographic data</b> .....                                                                                                                                                     | 3  |
| <b>NMR Spectra</b> .....                                                                                                                                                                     | 4  |
| <b>Computational Details</b> .....                                                                                                                                                           | 8  |
| <b>References</b> .....                                                                                                                                                                      | 16 |

## General Procedures

All reactions were performed under N<sub>2</sub> atmosphere in either a glovebox or using Schlenk technique. Glovebox solvents were dried using an Innovative Technologies Solvent Purification System. The dried solvents were stored under N<sub>2</sub> atmosphere over 3 Å molecular sieves in the glovebox. Deuterated solvents for NMR spectroscopy were purchased from Cambridge Isotope Laboratories and dried by stirring for three days over CaH<sub>2</sub>, distilled prior to use, and stored in the glovebox over 3 Å molecular sieves. NO<sub>2</sub>-C<sub>6</sub>H<sub>4</sub>-IF<sub>2</sub> and NO<sub>2</sub>-C<sub>6</sub>H<sub>4</sub>-I(OTFA)<sub>2</sub> were synthesised by following literature procedure.<sup>1-2</sup> All other reagents were purchased from Sigma Aldrich and used as received. Glassware was dried in an oven at 120 °C overnight and transferred to the glovebox port or Schlenk line where it was subjected to three vacuum cycles over 30 minutes prior to use. NMR spectra for all experiments were recorded using Bruker Ultrashield Plus 500 MHz and Ascend 400 MHz spectrometers.

## Experimental

Synthesis of  $\text{NO}_2\text{-C}_6\text{H}_4\text{-I}(\text{NTf}_2)_2$  from  $\text{NO}_2\text{-C}_6\text{H}_4\text{-IF}_2$  (Procedure 1)

To  $\text{NO}_2\text{-C}_6\text{H}_4\text{-IF}_2$  (14 mg, 48  $\mu\text{mol}$ ) in  $\text{CDCl}_3$  (1 ml),  $\text{TMSNTf}_2$  (34 mg, 96  $\mu\text{mol}$ ) was added while stored in cold well filled with metal beads cooled by  $\text{N}_2(\text{l})$ . The predominately insoluble  $\text{NO}_2\text{-C}_6\text{H}_4\text{-IF}_2$  rapidly dissolved, turning the solution a slight green. The solvent was removed *in-vacuo* leaving an off-white powder (qualitative conversion as observed by *in-situ* NMR, on attempts at isolation the off-white solid was recovered at 31 mg identified by  $^1\text{H}$  NMR to be 69:31%  $\text{NO}_2\text{-C}_6\text{H}_4\text{-I}(\text{NTf}_2)_2$ : $\text{NO}_2\text{-C}_6\text{H}_4\text{-I}$ , yield 54%).  $^1\text{H}$  NMR (400 MHz,  $\text{CDCl}_3$ )  $\delta$  (ppm): 8.64 (dd, 4H,  $\text{NO}_2\text{-C}_6\text{H}_4\text{-I}(\text{NTf}_2)_2$ ),  $^{19}\text{F}$  NMR (376 MHz,  $\text{CDCl}_3$ )  $\delta$  (ppm): -72.67,  $^{13}\text{C}\{^1\text{H}\}$  NMR (126 MHz,  $\text{CDCl}_3$ )  $\delta$  (ppm): 151.67 (s,  $\text{NO}_2\text{-C}$ ), 138.77 (s, -CH), 127.54 (s, -CH), 125.54 (s, C-I), 118.65 (q, S- $\text{CF}_3$ ). X-ray quality crystals were grown by vapour diffusion ( $\text{CHCl}_3/\text{C}_6\text{H}_{12}$ ).

Synthesis of  $\text{NO}_2\text{-C}_6\text{H}_4\text{-I}(\text{NTf}_2)_2$  from  $\text{NO}_2\text{-C}_6\text{H}_4\text{-I}(\text{OTFA})_2$  (Procedure 2)

To a solution of  $\text{NO}_2\text{-C}_6\text{H}_4\text{-I}(\text{OTFA})_2$  (10 mg, 21.1  $\mu\text{mol}$ ) was added  $\text{TMSNTf}_2$  (15 mg, 42.2  $\mu\text{mol}$ ) in  $\text{CH}_2\text{Cl}_2$ . The reaction immediately turned light yellow and was subsequently placed in the freezer for recrystallisation. The solvent was removed *in vacuo* to provide  $\text{NO}_2\text{-C}_6\text{H}_4\text{-I}(\text{NTf}_2)_2$  as beige coloured crystals.  $^1\text{H}$  NMR (400 MHz,  $\text{CDCl}_3$ )  $\delta$  (ppm): 8.64 (dd, 4H,  $\text{NO}_2\text{-C}_6\text{H}_4\text{-I}(\text{NTf}_2)_2$ ),  $^{19}\text{F}$  NMR (376 MHz,  $\text{CDCl}_3$ )  $\delta$  (ppm): -72.67. X-Ray quality crystals were grown in the NMR tube by leaving the solution undisturbed for 15 minutes.

Reaction of  $\text{NO}_2\text{-C}_6\text{H}_4\text{-I}(\text{NTf}_2)_2$  with 3-methylcyclohexene

To a solution of  $\text{NO}_2\text{-C}_6\text{H}_4\text{-I}(\text{NTf}_2)_2$  generated *in-situ* from synthesis procedure 1 while stored in a cold well filled with metal beads and cooled by  $\text{N}_2(\text{l})$ , 3-methylcyclohexene (1 equivalent, 5 mg, 48  $\mu\text{mol}$ , in 0.5 ml  $\text{CDCl}_3$ ) was added dropwise over 5 minutes, turning the reaction mixture a pale brown, the product of toluene and  $\text{NO}_2\text{-C}_6\text{H}_4\text{-I}$  were identified by  $^1\text{H}$  NMR.  $^1\text{H}$  NMR (400 MHz,  $\text{CDCl}_3$ )  $\delta$  (ppm): 2.35 (s, 3H), 7.16 (m, 2H), 7.25 (m, obscured by  $\text{CDCl}_3$  peak).

## X-Ray crystallographic data

Single crystals were selected under n-paratone oil, mounted on a nylon loop, and held under a stream of N<sub>2</sub> (180 K) on a Rigaku SuperNova CCD diffractometer using Cu K $\alpha$  radiation. Structure solution and refinement were performed using the SHELXTL suite of software. The X-ray data indicated the NO<sub>2</sub>-C<sub>6</sub>H<sub>4</sub>-I(NTf<sub>2</sub>)<sub>2</sub> crystal included a twin (150° rotation along the 010 direction). The best data set was obtained by removing the twin reflections from the hkl file. From the modified data set a solution was found in the space group  $P2_1/n$ ,  $R_{\text{int}} = 0.0609$ .

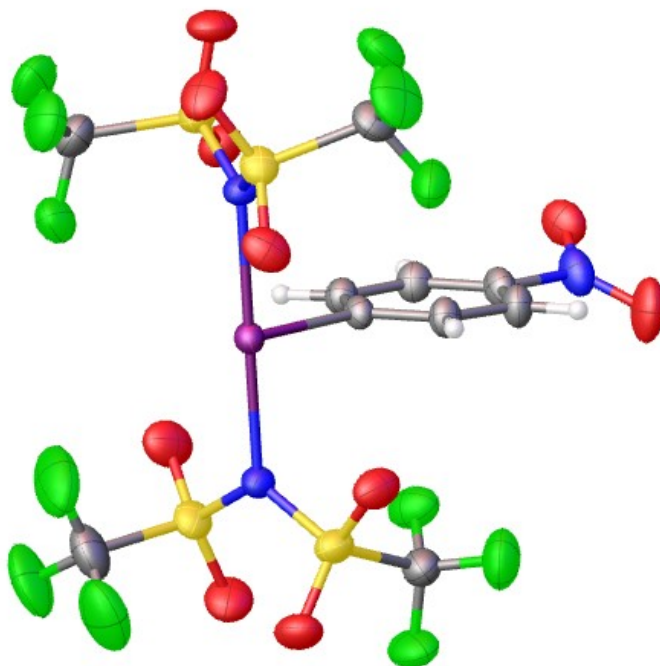

Figure S1 Thermal ellipsoid plot of NO<sub>2</sub>-C<sub>6</sub>H<sub>4</sub>-I(NTf<sub>2</sub>)<sub>2</sub>, thermal ellipsoids are drawn at the 50% probability level. CDCl<sub>3</sub> in the lattice has been removed for clarity.

Table S1 Crystallographic information of NO<sub>2</sub>-C<sub>6</sub>H<sub>4</sub>-I(NTf<sub>2</sub>)<sub>2</sub>.

| Compound              | NO <sub>2</sub> -C <sub>6</sub> H <sub>4</sub> -I(NTf <sub>2</sub> ) <sub>2</sub>                           |
|-----------------------|-------------------------------------------------------------------------------------------------------------|
| Empirical Formula     | C <sub>10</sub> H <sub>4</sub> I <sub>1</sub> N <sub>3</sub> O <sub>10</sub> F <sub>12</sub> S <sub>4</sub> |
| FW (g/mol)            | 809.28                                                                                                      |
| Crystal System        | Monoclinic                                                                                                  |
| Space Group           | $P2_1/n$                                                                                                    |
| $\alpha$ (Å)          | 13.4882(3)                                                                                                  |
| $b$ (Å)               | 12.8733(3)                                                                                                  |
| $c$ (Å)               | 15.4391(2)                                                                                                  |
| $\alpha$ (deg)        | 90                                                                                                          |
| $\beta$ (deg)         | 97.786(2)                                                                                                   |
| $\gamma$ (deg)        | 90                                                                                                          |
| $V$ (Å <sup>3</sup> ) | 2656.09(10)                                                                                                 |
| $Z$                   | 2                                                                                                           |
| $R1[ >2\sigma ]$      | 0.0338                                                                                                      |

wR2(F<sup>2</sup>)  
GOF (S)

0.0849  
1.053

## NMR Spectra

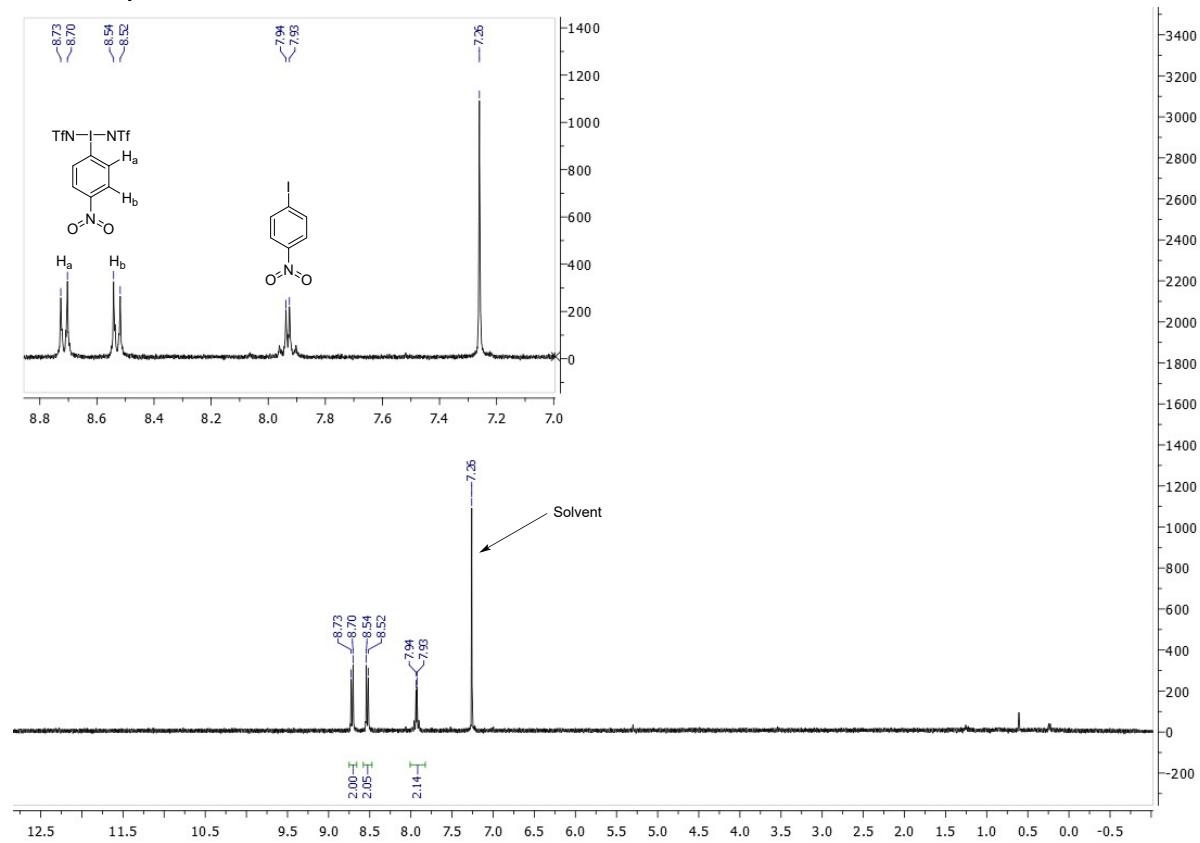

Figure S2 <sup>1</sup>H NMR of NO<sub>2</sub>-C<sub>6</sub>H<sub>4</sub>-I(NTf<sub>2</sub>)<sub>2</sub> isolated by procedure 1.

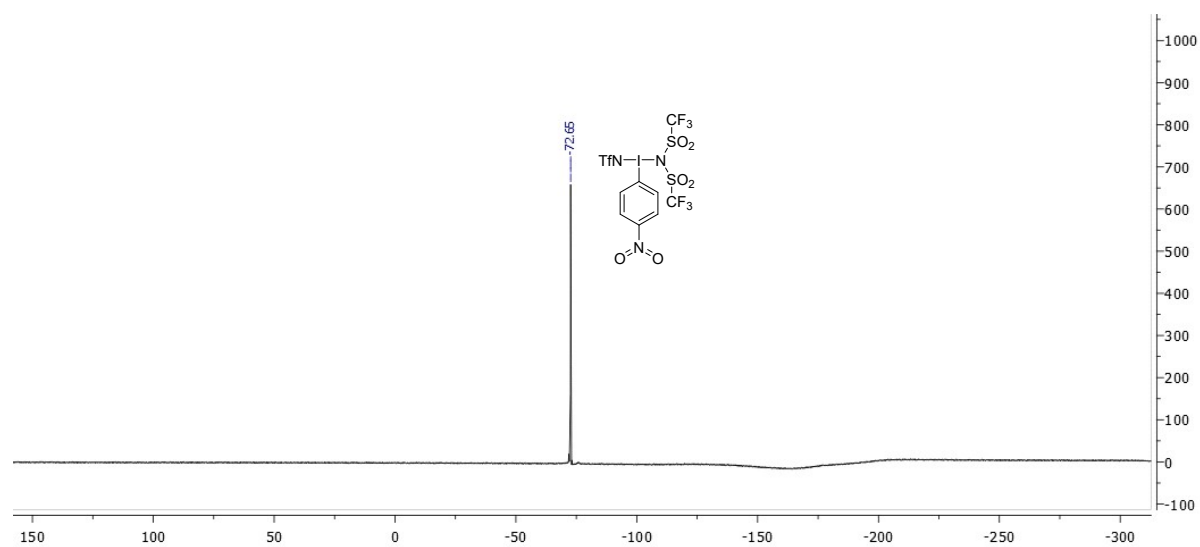

Figure S3 <sup>19</sup>F NMR of NO<sub>2</sub>-C<sub>6</sub>H<sub>4</sub>-I(NTf<sub>2</sub>)<sub>2</sub> isolated by procedure 1.

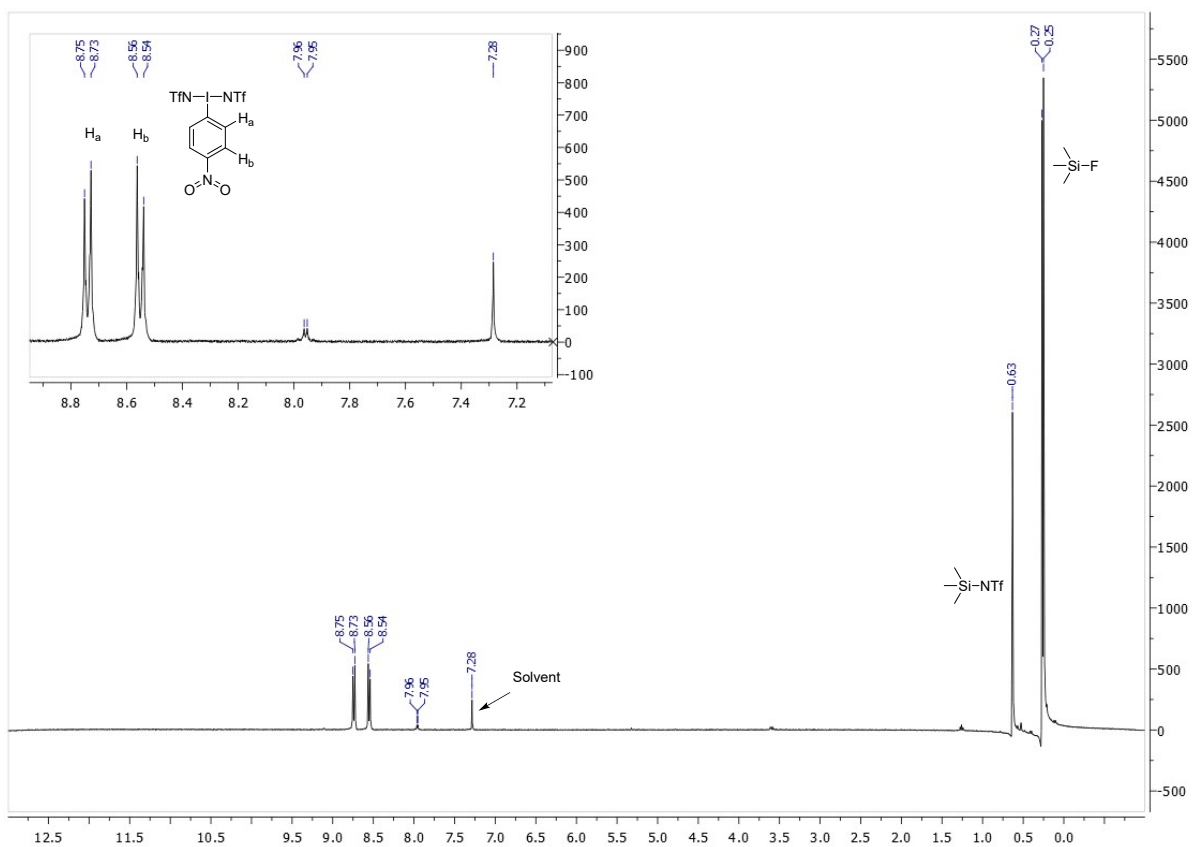

Figure S4  $^1\text{H}$  NMR of in-situ formation of  $\text{NO}_2\text{-C}_6\text{H}_4\text{-I}(\text{NTf}_2)_2$  by procedure 1, TMSF and TMSNTf<sub>2</sub> were identified from literature and stock.<sup>3</sup>

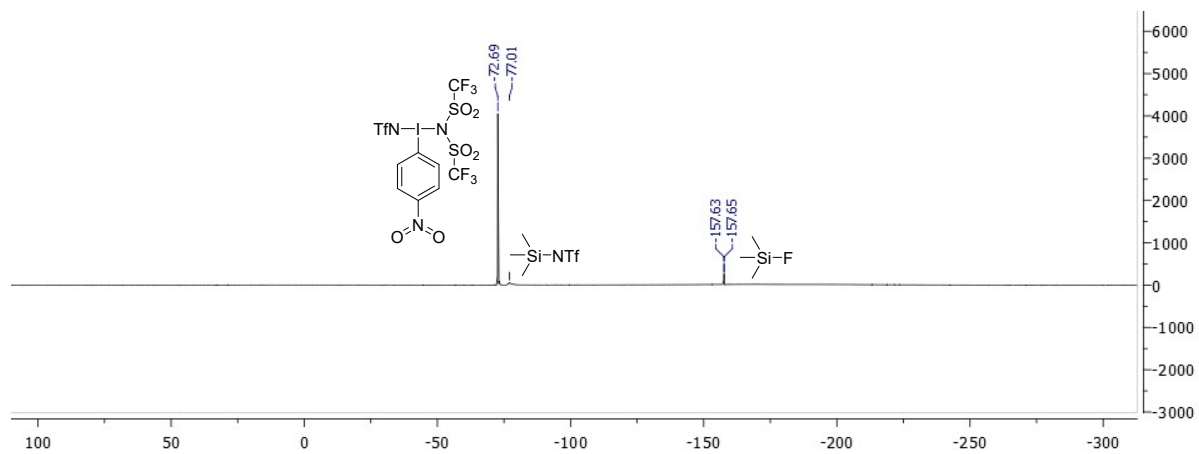

Figure 5  $^{19}\text{F}$  NMR of in-situ formation of  $\text{NO}_2\text{-C}_6\text{H}_4\text{-I}(\text{NTf}_2)_2$  by procedure 1.

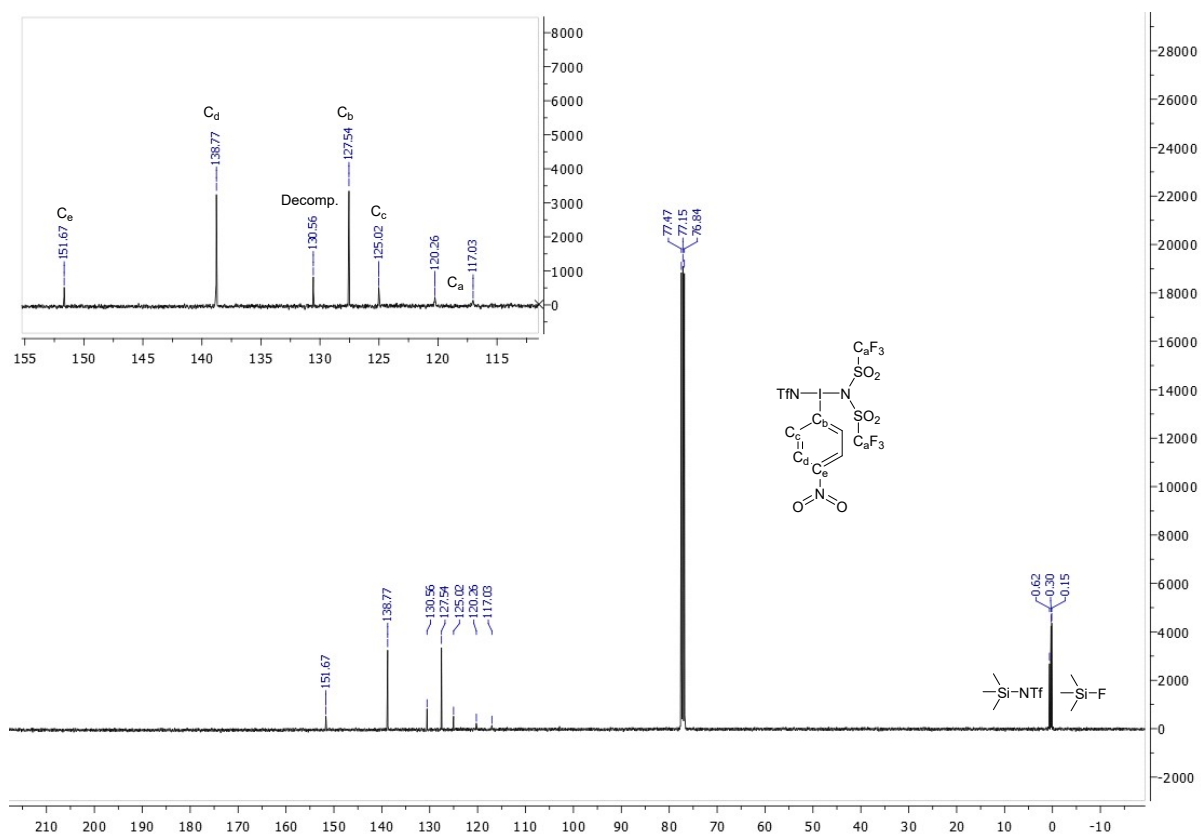

Figure S6  $^{13}\text{C}$  NMR of in-situ formation of  $\text{NO}_2\text{-C}_6\text{H}_4\text{-I}(\text{NTf}_2)_2$  by procedure 1, Instability of the compound lead to decomposition during  $^{13}\text{C}$  acquisition.

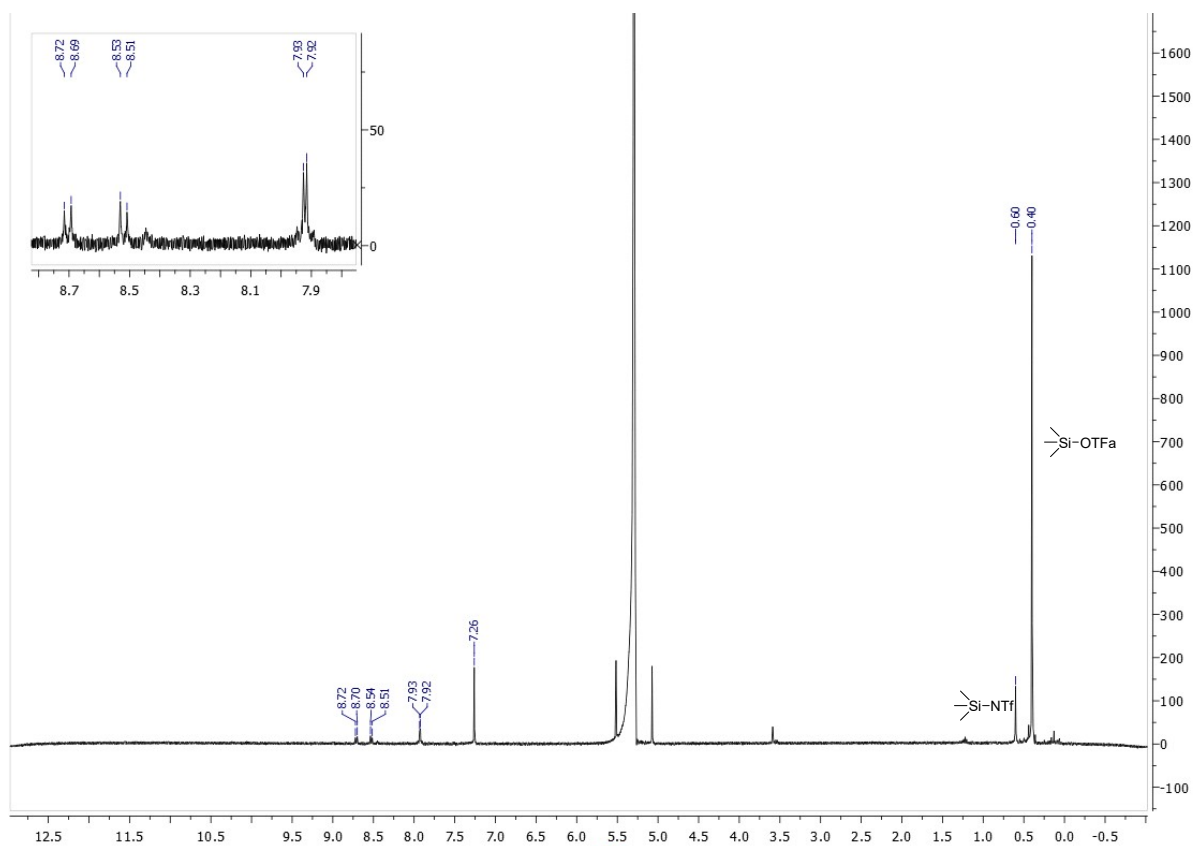

Figure S7  $^1\text{H}$  NMR of in-situ formation of  $\text{NO}_2\text{-C}_6\text{H}_4\text{-I}(\text{NTf}_2)_2$  by procedure 2.<sup>4</sup>

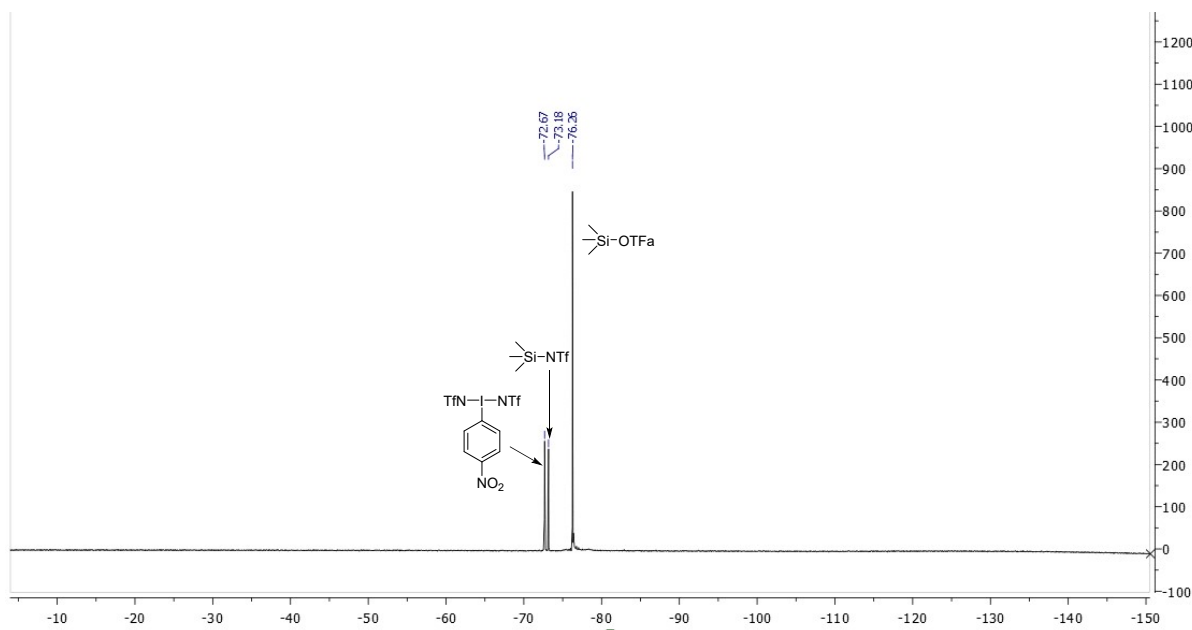

Figure S8  $^{19}\text{F}$  NMR of in-situ formation of  $\text{NO}_2\text{-C}_6\text{H}_4\text{-I}(\text{NTf}_2)_2$  by procedure 2.

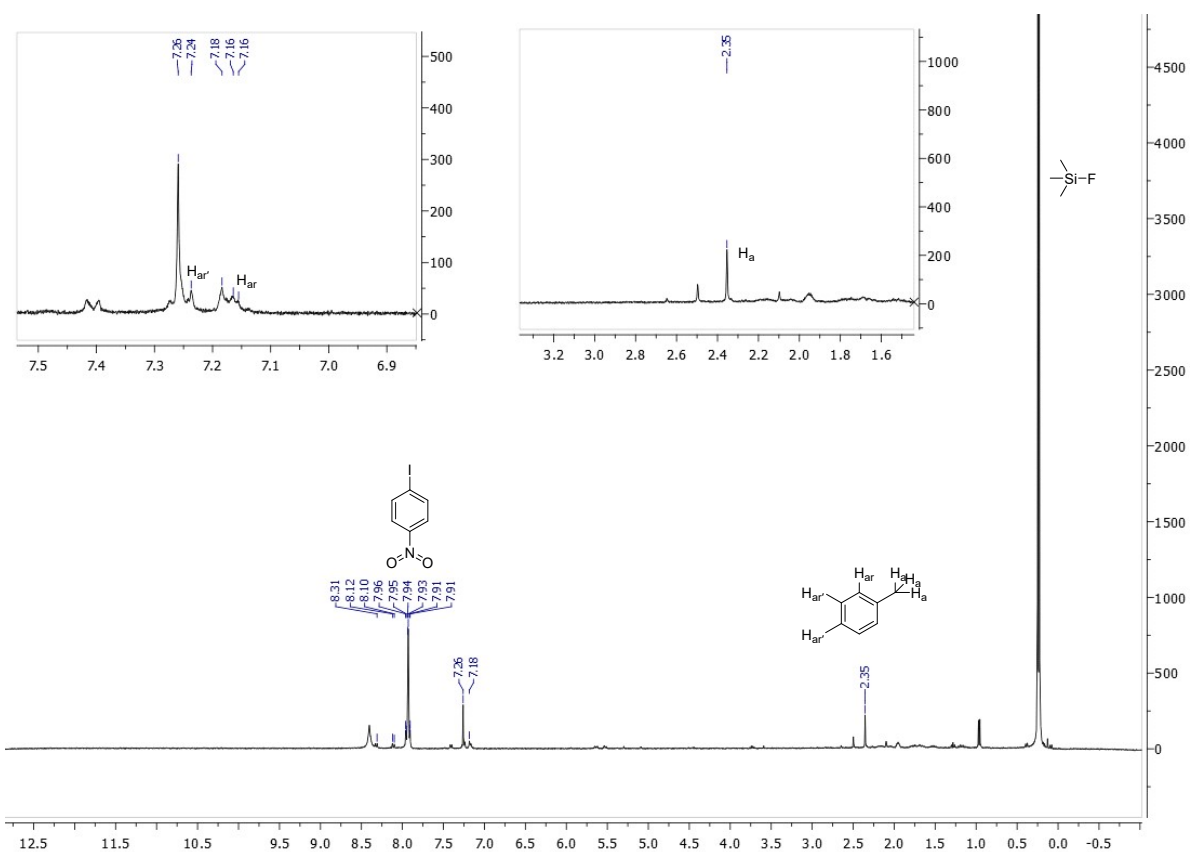

Figure S9  $^1\text{H}$  NMR of reaction of  $\text{NO}_2\text{-C}_6\text{H}_4\text{-I}(\text{NTf}_2)_2$  with 3-methylcyclohexene.

## Computational Details

### Cartesian Coordinates for optimised compound geometries:

All geometry optimisation, vibrational frequency were performed using  $\omega$ PBE/def2-TZVP within Gaussian 16 using the WebMO platform.<sup>5-7</sup> Molecular orbital calculations were performed on the optimized geometries using B3LYP/def2-TZVP.<sup>8,9</sup>

Coordinates and energies for PhI(OTf)<sub>2</sub>, NO<sub>2</sub>-C<sub>6</sub>H<sub>5</sub>-I(OTf)<sub>2</sub>, PhI(OAc)<sub>2</sub>, PhI(OTf)(OAc) have been previously reported.<sup>1,10</sup>

Cartesian coordinates are in Å and energies are given in Hartree.

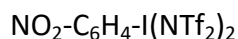

Electronic Energy: -4387.48746122 Hartree

```
S  0.00000000  0.00000000  0.00000000
C -1.15512200  1.11664900  0.90302300
F -1.67760400  1.95033100  0.01935100
F -2.11664700  0.42727800  1.48610300
F -0.48992600  1.81063700  1.82058900
N  0.78591100 -0.79829400  1.20252700
S  0.22987800 -2.19296100  1.87161000
C  0.08233500 -1.71787200  3.64578000
F -0.73225700 -0.68556800  3.79189400
F -0.39198900 -2.75659500  4.30715100
F  1.27772300 -1.39564700  4.13668000
O  1.30207900 -3.12621200  1.82785700
O -1.08003000 -2.50435100  1.44591700
I  3.02554300 -0.61023000  1.29136300
C  2.85395600  1.31869200  2.02257800
C  2.88480500  2.37137900  1.12925500
C  2.80630900  3.65380700  1.63438000
C  2.70201800  3.82233200  2.99650500
C  2.68181200  2.77150900  3.88625400
C  2.76374500  1.48609900  3.39106600
H  2.77420200  0.64060100  4.06433000
H  2.60821300  2.96362300  4.94753100
N  2.61390900  5.19852000  3.53167000
O  2.64871900  6.10182700  2.73585200
O  2.51308700  5.31884800  4.72603500
H  2.82437400  4.51661000  0.98323800
H  2.96415100  2.20275500  0.06510900
```



N 5.19723100 -0.44195500 1.49889300  
S 6.07814900 0.24645100 0.28411500  
C 6.76531500 1.82186700 1.01925700  
F 8.01903800 1.66447300 1.37295700  
F 6.68658000 2.75370100 0.08161000  
F 6.04380200 2.20301400 2.06729100  
O 7.18979800 -0.54997200 -0.07083600  
O 5.10228900 0.66573700 -0.66171400  
S 5.88707800 -1.06640600 2.84924400  
C 6.08846400 -2.85206100 2.43412700  
F 6.43748700 -3.48986500 3.53681200  
F 7.00507200 -3.02549800 1.50595800  
F 4.92309800 -3.32626600 1.99775900  
O 7.18249500 -0.52466700 3.02555100  
O 4.89273900 -1.03734700 3.86341400  
O -0.79821600 -0.85065000 -0.79484100  
O 0.98091900 0.85927600 -0.56957700

$C_6F_5I(NTf_2)_2$

Electronic Energy: -4679.12298221 Hartree

S 0.00000000 0.00000000 0.00000000  
N 0.76447700 -1.20322300 0.81271200  
I 3.02456400 -1.13769100 1.06232300  
C 2.88514200 0.63733400 2.06163200  
C 3.30471100 1.80465500 1.44506100  
C 3.24222400 3.00462500 2.11770600  
C 2.74187700 3.03460800 3.40778200  
C 2.30621100 1.87704800 4.02579300  
C 2.37885200 0.67789700 3.34899000  
F 1.93582000 -0.41329300 3.93790900  
F 1.81941500 1.92529900 5.25310500  
F 2.67540000 4.17959700 4.05177100  
F 3.64913900 4.12097600 1.54078400  
F 3.77589200 1.78277500 0.21563900  
N 5.17877000 -1.16253600 1.36406100  
S 6.17623700 -0.91175600 0.06259300  
O 7.19468700 -1.88977400 0.01426100  
C 7.02629500 0.71574000 0.42996100  
F 8.26764900 0.50203100 0.80180400  
F 7.01308400 1.43022000 -0.68100500  
F 6.38413700 1.38166700 1.38387000  
O 5.29489600 -0.66778400 -1.02252500  
S 5.76665700 -1.58178300 2.84116000  
O 7.10724400 -1.14682300 2.96478100

O 4.75423300 -1.24812900 3.77952200  
C 5.78382400 -3.42880000 2.81135000  
F 5.98869500 -3.84345100 4.04936500  
F 6.72792500 -3.89225500 2.02292000  
F 4.59935200 -3.86483900 2.38893800  
S 0.26402100 -2.76608100 0.78908800  
O 1.41143100 -3.53739700 0.43796300  
O -0.99074700 -2.93110300 0.16405400  
C -0.00899100 -3.11554900 2.57981900  
F -0.84516800 -2.23656500 3.10738900  
F -0.52156700 -4.32960200 2.67554100  
F 1.14288100 -3.07255200 3.23597900  
O -0.72117500 -0.46265600 -1.12176400  
C -1.24904700 0.60304200 1.21203500  
F -1.78872500 1.70534100 0.71973300  
F -2.18816400 -0.30174200 1.40971400  
F -0.65818100 0.88571500 2.37005500  
O 0.95834100 1.04618900 -0.10229700

PhI(undecafluorocarborane)<sub>2</sub>

Electronic energy: -3347.32984197 Hartree

C 0.00000000 0.00000000 0.00000000  
H -0.05634300 0.67276200 0.86055800  
B 1.23061900 -1.17024500 0.02347400  
B -0.50379200 -1.58953400 0.23056600  
F -0.92846500 -2.05669500 1.43110200  
B -1.48028300 -0.44655300 -0.72246400  
B -0.35401800 0.68269500 -1.52381800  
F -0.68205800 1.98963200 -1.60017500  
B -1.07560000 -0.65138400 -2.44876000  
B 0.17400900 -1.92544000 -2.54472000  
F 0.24608900 -2.81606800 -3.58656900  
B 0.67178500 -0.22012900 -2.66183600  
B 1.31682600 0.23571300 -1.06413600  
F 2.21300600 1.21107700 -0.80394400  
B 1.66489500 -1.38509300 -1.69765200  
B 0.50455400 -2.46891800 -0.89786800  
F 0.85055000 -3.86715700 -0.64137100  
I -0.35401800 -5.74266900 -0.82764700  
C -0.35401800 -5.74266900 -2.81594800  
C 0.79296900 -6.21038700 -3.48912200  
C 0.78128100 -6.18857600 -4.86568500  
C -0.35401800 -5.74266900 -5.54368800  
C -1.48931700 -5.29676200 -4.86568500

C -1.50100500 -5.27495100 -3.48912200  
H -2.36037500 -4.88990000 -2.93861000  
H -2.36131800 -4.94725000 -5.42021100  
H -0.35401800 -5.74266900 -6.63641700  
H 1.65328200 -6.53808800 -5.42021100  
H 1.65233900 -6.59543800 -2.93861000  
F -1.55858600 -7.61818100 -0.64137100  
B -1.21259000 -9.01642000 -0.89786800  
B -0.20424400 -9.89580400 0.23056600  
C -0.70803600 -11.4853380 0.00000000  
H -0.65169300 -12.1581000 0.86055800  
B -1.93865500 -10.3150930 0.02347400  
B -2.37293100 -10.1002450 -1.69765200  
B -1.37982100 -11.2652090 -2.66183600  
F -1.84451200 -11.8044880 -3.81881600  
B -0.88204500 -9.55989800 -2.54472000  
B 0.44802800 -9.42026400 -1.34694000  
B 0.77224700 -11.0387850 -0.72246400  
F 1.93838200 -11.4897750 -0.21059600  
B 0.36756400 -10.8339540 -2.44876000  
F 1.28469100 -11.0139190 -3.43766000  
B -0.35401800 -12.1680330 -1.52381800  
F -0.02597800 -13.4749700 -1.60017500  
B -2.02486200 -11.7210510 -1.06413600  
F -2.92104200 -12.6964150 -0.80394400  
F 1.37735900 -8.39923000 -1.44016500  
F -0.95412500 -8.66927000 -3.58656900  
F -3.60481700 -9.67101000 -2.08296200  
F -2.76136800 -10.1921370 1.08840600  
F 0.22042900 -9.42864300 1.43110200  
B -1.15606400 -2.06507400 -1.34694000  
F -2.08539500 -3.08610800 -1.44016500  
F 2.89678100 -1.81432800 -2.08296200  
F 1.13647600 0.31915000 -3.81881600  
F -1.99272700 -0.47141900 -3.43766000  
F -2.64641800 0.00443700 -0.21059600  
F 2.05333200 -1.29320100 1.08840600

Phi(PF<sub>6</sub>)<sub>2</sub>

Electronic Energy: -2410.13571289 Hartree

P 0.00000000 0.00000000 0.00000000  
F 1.52154300 -1.31113500 -0.90416900  
I 1.52154300 -3.32484000 -0.77950400  
C 1.52154300 -3.32484000 -2.84287200  
C 2.49173700 -4.05465100 -3.49809600

C 2.47696700 -4.05278500 -4.87951800  
C 1.52154300 -3.32484000 -5.56479600  
C 0.56611900 -2.59689500 -4.87951800  
C 0.55134900 -2.59502900 -3.49809600  
H -0.19266900 -2.02931900 -2.95225700  
H -0.18106300 -2.02918200 -5.41995000  
H 1.52154300 -3.32484000 -6.64819000  
H 3.22414900 -4.62049800 -5.41995000  
H 3.23575500 -4.62036100 -2.95225700  
F 1.52154300 -5.33854500 -0.90416900  
P 3.04308600 -6.64968000 0.00000000  
F 4.01287100 -5.62209700 -0.72409200  
F 4.12056100 -7.55260500 0.63736600  
F 2.87302500 -7.39240000 -1.37344000  
F 1.76144100 -7.37640800 0.53414800  
F 2.89687300 -5.59489900 1.17232500  
F -1.07747500 0.90292500 0.63736600  
F 1.28164500 0.72672800 0.53414800  
F 0.17006100 0.74272000 -1.37344000  
F -0.96978500 -1.02758300 -0.72409200  
F 0.14621300 -1.05478100 1.17232500

Phi(SbF<sub>6</sub>)<sub>2</sub>

Electronic Energy: -2208.07063038 Hartree

Sb 0.00000000 0.00000000 0.00000000  
F 1.56278000 -1.21913100 -0.80154000  
I 1.56278000 -3.28566700 -0.70337700  
C 1.56278000 -3.28566700 -2.74522400  
C 2.75433500 -3.54314800 -3.40006100  
C 2.73856700 -3.54689000 -4.77972400  
C 1.56278000 -3.28566700 -5.46121700  
C 0.38699300 -3.02444400 -4.77972400  
C 0.37122500 -3.02818600 -3.40006100  
H -0.53821700 -2.81905900 -2.85128800  
H -0.52660300 -2.81909100 -5.32309300  
H 1.56278000 -3.28566700 -6.54471300  
H 3.65216300 -3.75224300 -5.32309300  
H 3.66377700 -3.75227500 -2.85128800  
F 1.56278000 -5.35220300 -0.80154000  
Sb 3.12556000 -6.57133400 0.00000000  
F 4.18712200 -5.37017900 -0.97975500  
F 4.53056800 -7.52863700 0.72383000  
F 2.89545100 -7.57578900 -1.54499400  
F 1.74803200 -7.49742100 0.82886300  
F 3.02836800 -5.25665900 1.33472500

F -1.40500800 0.95730300 0.72383000  
F 1.37752800 0.92608700 0.82886300  
F 0.23010900 1.00445500 -1.54499400  
F -1.06156200 -1.20115500 -0.97975500  
F 0.09719200 -1.31467500 1.33472500

Phi(OTFA)<sub>2</sub>

Electronic Energy: -1581.47924091 Hartree

C 0.00000000 0.00000000 0.00000000  
C 1.45865500 0.31253900 -0.41008700  
O 2.25661300 0.24561200 0.61765000  
I 4.30438200 0.52843400 0.26194900  
C 3.93203000 2.55030300 0.12633500  
C 3.96172400 3.30423800 1.28335700  
C 3.71754500 4.66020100 1.18960000  
C 3.45250300 5.23283500 -0.04114200  
C 3.42699600 4.45831500 -1.18601700  
C 3.66786600 3.09959200 -1.11230300  
H 3.63246000 2.48050200 -1.99868400  
H 3.21515900 4.91059200 -2.14692500  
H 3.26145600 6.29722800 -0.10816900  
H 3.73571000 5.27040900 2.08410200  
H 4.17184000 2.84741100 2.24205400  
O 6.30979700 1.14974400 0.00453100  
C 7.09956000 0.12273100 0.03090200  
O 6.76336400 -1.02446800 0.17814500  
C 8.58152000 0.52181400 -0.14931300  
F 9.36691000 -0.54359600 -0.12332000  
F 8.75448000 1.14799900 -1.31577300  
F 8.95842600 1.34999500 0.82873800  
O 1.74868900 0.58004500 -1.54263400  
F -0.42234100 0.88001100 0.91253700  
F -0.08386600 -1.22270400 0.52960700  
F -0.81085800 0.06058300 -1.04569900

Undecafluorocarborane anion

Electronic energy: -1409.37849824 Hartree

B 0.00000000 0.00000000 0.00000000  
B 0.64930700 -0.68099800 -1.50073900  
C 1.39450000 0.63621500 -2.26733300  
H 1.39385300 0.63638600 -3.35926800  
B -0.08760000 0.93766700 -1.50002600  
B 0.35992600 1.76472900 0.00090800

B 2.14933100 1.96865300 0.00129000  
F 2.75461200 3.03721300 0.60982100  
B 1.39480500 0.63427900 0.92475300  
B 1.56798600 -0.88726900 -0.00068700  
B 2.41644200 -0.47971700 -1.50104900  
F 3.18130300 -1.31365900 -2.26181500  
B 2.89617100 0.32932900 0.00002600  
F 4.10018500 0.08358200 0.60722100  
B 2.77130100 1.26328600 -1.49995000  
F 3.80125600 1.73284700 -2.25990200  
B 1.22343100 2.13947200 -1.49947800  
F 1.09537500 3.26415900 -2.25934700  
F 1.70738300 -2.10840800 0.60699100  
F 1.39445200 0.63389600 2.29464700  
F -0.47010300 2.66901400 0.60930800  
F -1.19695400 1.16429800 -2.26004300  
F 0.09169300 -1.66522300 -2.26206400  
F -1.11745900 -0.50999100 0.60789700

NTf<sub>2</sub><sup>-</sup>

Electronic Energy: -1827.03550628 Hartree

S 0.00000000 0.00000000 0.00000000  
N 1.13484100 -0.83392000 -0.67747400  
S 2.27027800 -1.66709100 -0.00004800  
O 2.07973800 -1.99972300 1.37538900  
O 2.71824000 -2.68265700 -0.89954200  
C 3.66537900 -0.46796100 0.01545400  
F 4.74515500 -1.04209500 0.55781600  
F 3.37166000 0.61560400 0.73142400  
F 3.98793900 -0.07549600 -1.21752700  
O 0.19080900 0.33244500 1.37546100  
C -1.39581100 -1.19825600 0.01548300  
F -1.10303500 -2.28169000 0.73213500  
F -2.47546700 -0.62315400 0.55693600  
F -1.71792700 -1.59117600 -1.21749200  
O -0.44745900 1.01590400 -0.89938400

OTf<sup>-</sup>

Electronic Energy

S 0.00000000 0.00000000 0.00000000  
O -0.30884800 -1.40822300 -0.00385700  
O -0.30866500 0.70083900 1.22159600  
C 1.84133700 -0.00008900 0.00000500

F 2.34271500 -0.62028100 -1.08022400  
F 2.34266600 1.24580400 0.00298600  
F 2.34272500 -0.62548200 1.07722500  
O -0.30869800 0.70751600 -1.21771000

OAc<sup>-</sup>

Electronic Energy: -228.473727979 Hartree

C 0.00000000 0.00000000 0.00000000  
C -1.54664500 0.05106200 -0.00037000  
O -2.03467500 1.19974700 0.00049900  
O -2.13634100 -1.04764400 0.00050200  
H 0.38094000 0.54823900 -0.86479100  
H 0.36605300 -1.02718900 -0.02292300  
H 0.37656300 0.50464400 0.89299300

OTFA<sup>-</sup>

Electronic Energy: -526.201174403 Hartree

C 0.00000000 0.00000000 0.00000000  
C 1.57222400 -0.00226600 -0.00027300  
O 2.03715500 -1.14663300 -0.00008500  
O 2.09572600 1.11460600 -0.00004400  
F -0.55919300 1.22468800 -0.00576800  
F -0.50802400 -0.64233500 -1.07724100  
F -0.50665500 -0.63164000 1.08438700

PhI

Electronic Energy: -529.28930457 Hartree

C 0.00000000 0.00000000 0.00000000  
C 0.68444400 -1.20169300 0.00003400  
C 2.06692200 -1.19584900 0.00005400  
C 2.76043200 -0.00015400 0.00014400  
C 2.06708500 1.19553000 0.00010000  
C 0.68448500 1.20147900 -0.00001900  
H 0.14232700 2.13868000 -0.00012300  
H 2.60410600 2.13679000 0.00027100  
H 3.84385600 -0.00025500 0.00020000  
H 2.60395900 -2.13710900 0.00008800  
H 0.14204400 -2.13873900 0.00003600  
I -2.07167500 -0.00011600 0.00009000

NO<sub>2</sub>-C<sub>6</sub>H<sub>4</sub>-I

Electronic Energy: -733.753165608 Hartree

C 0.00000000 0.00000000 0.00000000  
C 0.68403600 -1.20383500 -0.00019100  
C 2.06385400 -1.20621000 -0.00017400  
C 2.72866100 0.00000000 0.00000300  
C 2.06385400 1.20621000 0.00017800  
C 0.68403700 1.20383500 0.00019200  
H 0.14266500 2.14085700 0.00036300  
H 2.62675300 2.12937200 0.00028300  
N 4.20009300 0.00000000 0.00000600  
O 4.75717800 -1.07037700 0.00046100  
O 4.75717800 1.07037700 -0.00048000  
H 2.62675300 -2.12937200 -0.00027800  
H 0.14266500 -2.14085700 -0.00036300  
I -2.06702800 0.00000000 -0.00000300

## References

1. L. Sharp-Bucknall, Tania, J. L. Dutton, *Angew. Chem. Int. Ed.* 2022, **61**, 46. doi.org/10.1002/anie.202212380
2. A. A. Zagulyaeva, M. S. Yusubov, V. V. Zhdankin, *J. Org. Chem.* 2010, **75**, 2119-2122.
3. C. P. Johnston, T. H. West, R. E. Dooley, M. Reid, A. B. Jones, E. J. King, A. G. Leach, G. C. Lloyd-Jones, *J. Am. Chem. Soc.* 2018, **140**, 11112– 11124, DOI: 10.1021/jacs.8b06777
4. H. J. Tsai, C-W. Hsieh, *J Chin. Chem. Soc.* 2007, **54**, 749-757.
5. J. Heyd, G. E. Scuseria, *J Phys. Chem.* 2003, **118**, 8207.
6. J. Heyd, G. E. Scuseria, *J Phys. Chem.* 2004, **120**, 7274.
7. F. Weigend, R. Ahlrichs, *Phys. Chem. Chem. Phys.* 2005, **7**, 3297-3305.
8. A. D. Becke, *J. Chem. Phys.* 1993, **98**, 5648-5652.
9. F Weigend, *Phys. Chem. Chem. Phys.* 2006, **8**, 1057-1065.
10. Tania, S. D. Houston, L. Sharp-Bucknall, T. B. Poynder, M. Albayer, J. L. Dutton., *Chem. Eur. J.*, 2020, **26**, 15863-15866
